# Supplementary material
Source: PubMed Central journal article supplement (PMC3020002)

FIG. S1

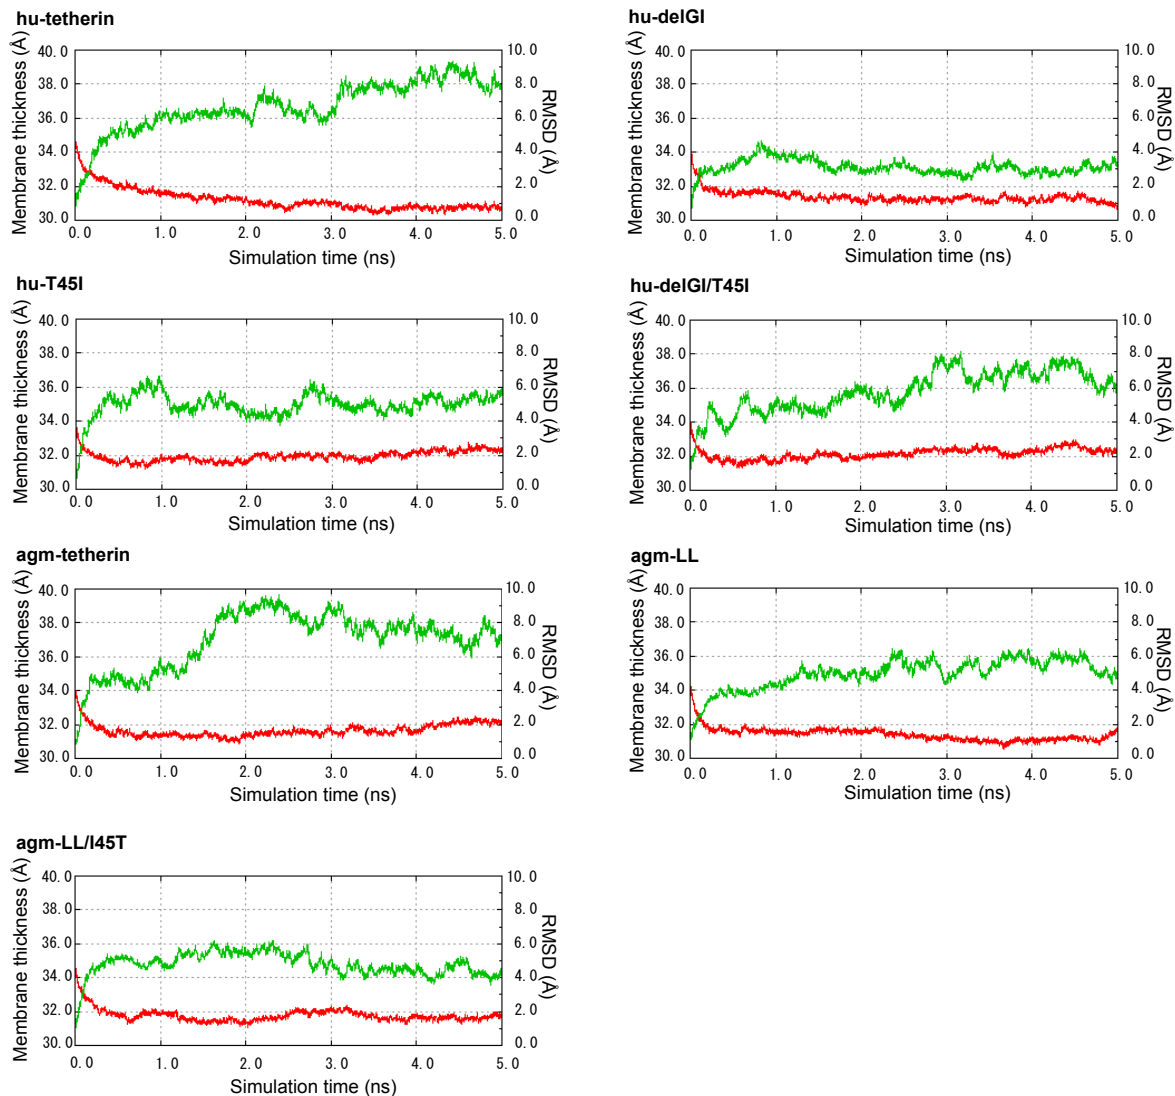

FIG. S2

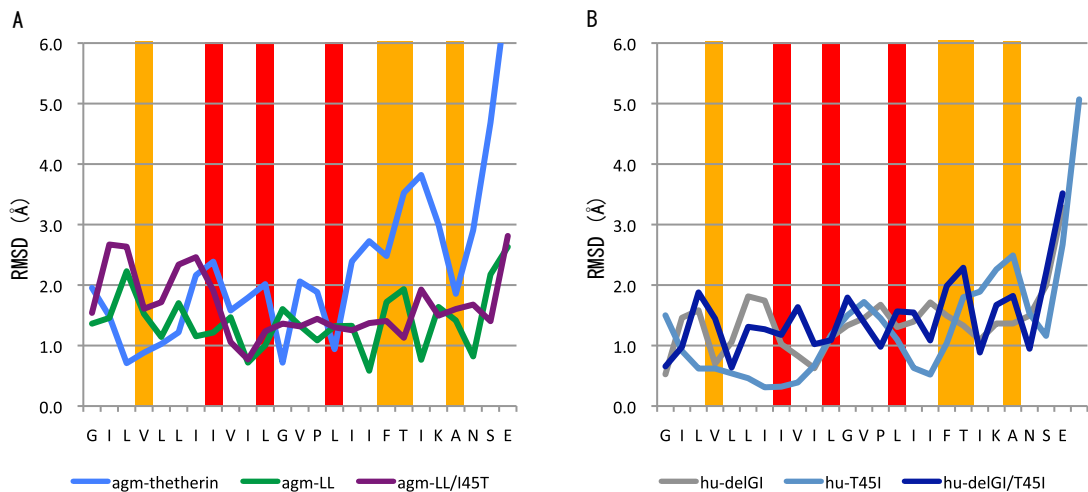

FIG. S3

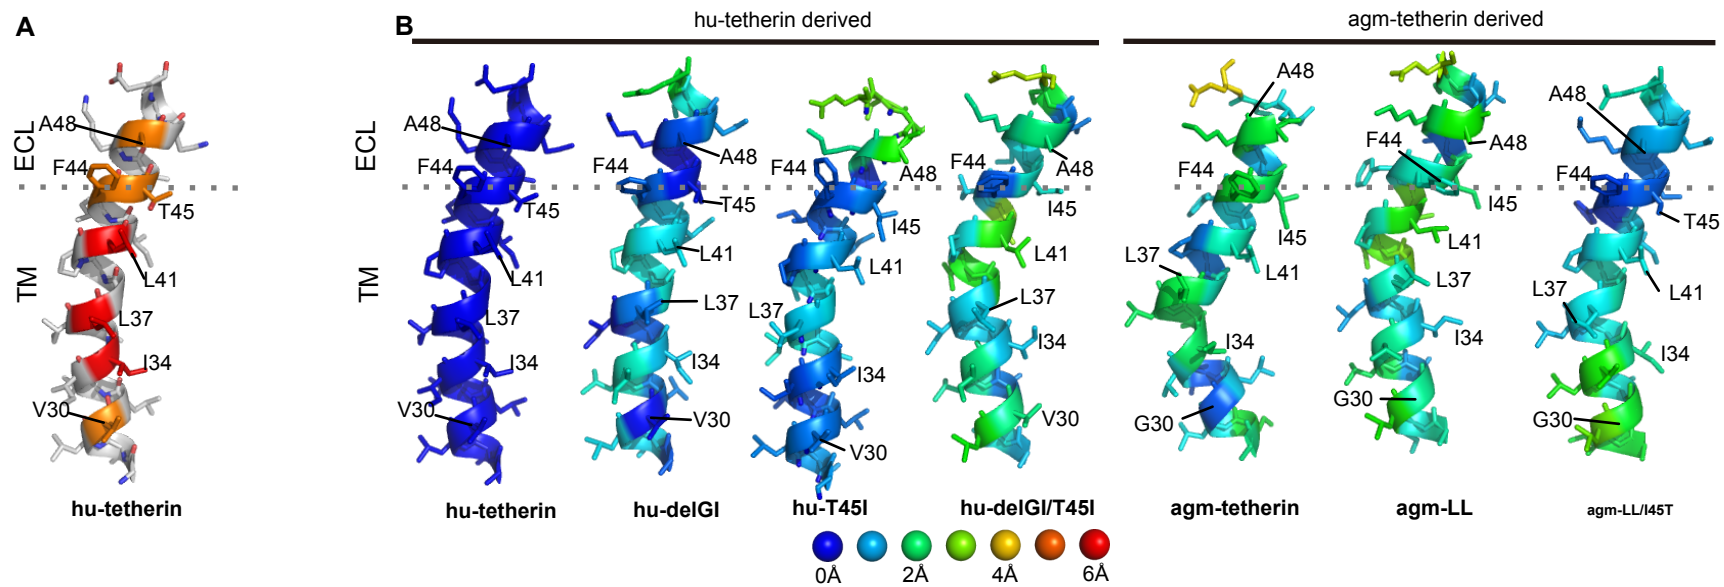

Supplement: supp_85_2_932__1.pdf [file supp_85_2_932__1.pdf]
